# Supplementary material
Source: publisher figshare collection journal article supplement (https://tandf.figshare.com/articles/dataset/_/1590018)
Supplement: Supplementary file 1 [file 2]

# Supplementary Material to “Anomaly Detection in Images with Smooth Background Via Smooth-Sparse Decomposition”

Hao Yan, Kamran Paynabar, Jianjun Shi

September 24, 2015

## Appendix A

**Proposition 1.** *If  $B_a$  is orthogonal, in iteration  $k$ , the subproblem  $\theta_a^{(k)} = \operatorname{argmin}_{\theta_S} \|y - B\theta^{(k)} - B_a\theta_a\|^2 + \gamma\|\theta_a\|_1$  has a closed-form solution in the form of  $\theta_a^{(k)} = S_{\frac{\gamma}{2}}(B_a^T(y - B\theta^{(k)}))$ , in which  $S_\gamma(x) = \operatorname{sgn}(x)(|x| - \gamma)_+$  is the soft-thresholding operator, and  $\operatorname{sgn}(x)$  is the sign function and  $x_+ = \max(x, 0)$ .*

*Proof.* If  $B_a$  is orthogonal, in each iteration  $k$ , we solve  $\theta_a^{(k)} = \operatorname{argmin}_{\theta_S} \|y - B\theta^{(k)} - B_a\theta_a\|^2 + \gamma\|\theta_a\|_1$ . The first Karush–Kuhn–Tucker (KKT) condition of this optimization problem can be expressed as:  $\nabla\|y - B\theta^{(k)} - B_a\theta_a\|^2 + \gamma g = 0$ , where  $\nabla$  is the gradient operator and  $g = [g_i] = \begin{cases} \operatorname{sgn}(\theta_{ai}) & \theta_{ai} \neq 0 \\ [-1, 1] & \theta_{ai} = 0 \end{cases}$ . The square is  $\|y - B\theta^{(k)} - B_a\theta_a\|^2 = \theta_a^T B_a^T B_a \theta_a - 2\theta_a^T B_a^T (y - B\theta^{(k)}) + \|y - B\theta^{(k)}\|^2$ . Since  $B_a^T B_a = I$ , the loss function can be simplified to  $\|y - B\theta^{(k)} - B_a\theta_a\|^2 = \theta_a^T \theta_a - 2\theta_a^T B_a^T (y - B\theta^{(k)}) + \|y - B\theta^{(k)}\|^2$ . Consequently, after simplification, the KKT condition gives  $\theta_a = B_a^T (y - B\theta^{(k)}) - \frac{\gamma}{2}g$ . We consider two cases for this solution, if  $\theta_{ai} \neq 0$ , then  $\theta_{ai} + \frac{\gamma}{2}\operatorname{sgn}(\theta_{ai}) = B_S^T (y - B\theta^{(k)})$ . If  $\theta_{ai} = 0$ , then  $B_a^T (y - B\theta^{(k)}) = \frac{\gamma}{2}g \in [-\frac{\gamma}{2}, \frac{\gamma}{2}]$ . The solution can be given in a compact form of  $\theta_a^{(k)} = \operatorname{sgn}(B_a^T (y - B\theta^{(k)}))(|B_a^T (y - B\theta^{(k)})| - \frac{\gamma}{2})_+$ , which is a soft-thresholding operator denoted by  $S_{\frac{\gamma}{2}}(B_a^T (y - B\theta^{(k)}))$ .  $\square$

## Appendix B

**Proposition 2.** *The BCD algorithm attains the global optimum of the SSD loss function in (1).*

$$\operatorname{argmin}_{\theta, \theta_a} \|e\|^2 + \lambda\theta^T R\theta + \gamma\|\theta_a\|_1, \quad \text{subject to. } y = B\theta + B_a\theta_a + e \quad (1)$$

*Proof.* (Tseng, 2001) in page 484, Theorem 5.1 proved that if an objective function  $f$  can be decomposed into the sum of a continuous function  $f_0$  and some non-differentiable functions  $f_i = 1, \dots, N$ , with some basic continuity assumptions on  $f_0$ , the BCD algorithm guarantees to attain a local optimum. It is clear that the SSD objective function in (1) is comprised of a continuous function  $\|e\|^2 + \lambda\theta^T R\theta$  and a non-differentiable penalty term  $\gamma\|\theta_a\|_1$ . Consequently, the BCD algorithm converges to a local optimum. In addition, since problem (1) is convex, the attained optimum is the global optimum.  $\square$

## Appendix C:

**Proposition 3.** *The SSD problem in (1) is equivalent to a weighted LASSO problem in the form of*

$$\operatorname{argmin}_{\theta_a} F(\theta_a) = (y - B\theta_a)^T (I - H)(y - B\theta_a) + \gamma\|\theta_a\|_1 \quad (2)$$

with  $H = B(B^T B + \lambda R)^{-1} B^T$ .

*Proof.* We first solve (1) for  $\theta$  by fixing  $\theta_a$ . That is  $\hat{\theta} = \operatorname{argmin}_{\theta} \|y - B\theta - B_a\theta_a\|^2 + \lambda\theta^T R\theta + \gamma\|\theta_a\|_1$ , which can be solved via  $\hat{\theta} = (B^T B + \lambda R)^{-1} B^T (y - B_a\theta_a)$ . Thus, it can be written that  $B\hat{\theta} = B(B^T B + \lambda R)^{-1} B^T (y - B_a\theta_a) = H(y - B_a\theta_a)$ . By plugging in this into (1), we have  $\hat{\theta} = \operatorname{argmin}_{\theta} \|y - H(y - B_a\theta_a) - B_a\theta_a\|^2 + \lambda(y - B_a\theta_a)^T H^T R H (y - B_a\theta_a) + \gamma\|\theta_a\|_1$ . After simplification and since  $(I - H)^2 + \lambda B K_{\lambda}^{-1} R K_{\lambda}^{-1} B^T (y - B_a\theta_a) = I - H$ , where  $K_{\lambda} = B^T B + \lambda R$ , we can show that  $\|y - B\theta - B_a\theta_a\|^2 + \lambda\theta^T R\theta + \gamma\|\theta_a\|_1 = (y - B_a\theta_a)^T (I - H)(y - B_a\theta_a) + \gamma\|\theta_a\|_1$ , which is the weighted LASSO formulation.  $\square$

## Appendix D:

*Claim 4.* The  $f(\theta_a) = (y - B_a\theta_a)^T (I - H)(y - B_a\theta_a)$  is convex for  $\theta_a$ .

*Proof.*  $f(\theta_a) = (y - B_a\theta_a)^T (I - H)(y - B_a\theta_a)$ . To prove  $f(\theta_a)$  is convex, we only need to show that  $I - H$  is a positive semi-definite matrix. From Appendix C, it is given that  $I - H = (I - H)^2 + \lambda B(B^T B + \lambda R)^{-1} R (B^T B + \lambda R)^{-1} B^T$ . Clearly, the first term  $(I - H)^2$  is a positive semi-definite matrix. For the second term, since  $R$  is a positive semi-definite matrix,  $B(B^T B + \lambda R)^{-1} R (B^T B + \lambda R)^{-1} B^T$  is also positive semi-definite. Consequently,  $f(\theta_a)$  is a convex function.  $\square$

## Appendix E:

*Claim 5.*  $f(\cdot)$  is Lipschitz continuous, in which satisfies  $\|\nabla f(\alpha) - \nabla f(\beta)\| \leq L\|\alpha - \beta\|$  for any  $\alpha, \beta \in R$  with  $L = 2\|B_a\|_2^2$

*Proof.* We first show that  $H$  is positive semidefinite matrix.  $H = B(B^T B + \lambda R)^{-1} B^T$ . Since  $B^T B + \lambda R$  is positive definite matrix,  $(B^T B + \lambda R)^{-1}$  is also positive definite matrix, and  $H$  is positive semi-definite matrix.

We then prove that  $\|I - H\|_2 \leq 1$ . Notice that  $\|X\|_2$  refers to the spectrum norm of matrix  $X$ . This is because that  $\|I - H\|_2 = \sqrt{\lambda_{\max}[(I - H)^2]} = \lambda_{\max}(I - H) = 1 - \lambda_{\min}(H) \leq 1$ . The last equation holds because  $\lambda_{\min}(H) \geq 0$  since  $H$  is positive semi-definite matrix. Note that  $\lambda_{\max}(X)$  refers to the largest eigenvalue of matrix  $X$  and  $\lambda_{\min}(X)$  refers to the smallest eigenvalue of matrix  $X$ .

Consequently,  $\nabla f(\alpha) = \nabla(y - B_a\alpha)^T (I - H)(y - B_a\alpha) = 2B_a^T (I - H)(B_a\alpha - y)$ .  $\|\nabla f(\alpha) - \nabla f(\beta)\| = \|2B_a^T (I - H)B_a(\alpha - \beta)\| \leq \|2B_a^T (I - H)B_a\|_2 \cdot \|\alpha - \beta\| \leq L\|\alpha - \beta\|$ , in which  $L = 2\|B_a\|_2^2$

The last equation holds because  $\|2B_a^T (I - H)B_a\|_2 \leq \|2B_a^T\|_2 \|(I - H)\|_2 \|B_a\|_2 \leq \|2B_a^T\|_2 \|B_a\|_2 = 2\|B_a\|_2^2$ .  $\square$

## Appendix F:

**Proposition 6.** The proximal gradient method for the SSD problem in (1), given by  $\theta_a^{(k)} = \operatorname{argmin}_{\theta_a} \{f(\theta_a^{(k-1)}) + \langle \theta_a - \theta_a^{(k-1)}, \nabla f(\theta_a^{(k-1)}) \rangle + \frac{L}{2} \|\theta_a - \theta_a^{(k-1)}\|^2 + \gamma\|\theta_a\|_1\}$ , has a closed-form solution in each iteration  $k$ , in the form of a soft-thresholding function as follows:

$$\theta_a^{(k)} = S_{\frac{\gamma}{L}}(\theta_a^{(k-1)} + \frac{2}{L} B_a^T (y - B_a\theta_a^{(k-1)} - \mu^{(k)})) \quad (3)$$

with  $L = 2\|B_a\|_2^2$ .

*Proof.* Since  $\nabla f(\theta_a^{(k-1)}) = 2B_a^T B_a\theta_a^{(k-1)} - 2B_a^T (y - B\theta^{(k)})$ , in each iteration given  $\theta_a^{(k-1)}$ , the  $\theta_a^{(k)} = \operatorname{argmin}_{\theta_a} \|\theta_a - \theta_a^{(k-1)} - \frac{2}{L} B_a^T (y - B\theta^{(k)} - B_a\theta_a^{(k-1)})\|^2 + \gamma\|\theta_a\|_1\}$ . Thus, from the result of Appendix A, it is straightforward to show that this problem can be solved using a soft thresholding operator in the form of  $\theta_a^{(k)} = S_{\frac{\gamma}{L}}(\theta_a^{(k-1)} + \frac{2}{L} B_a^T (y - B_a\theta_a^{(k-1)} - \mu^{(k)}))$ .  $\square$

## Appendix G:

*Claim 7.* Suppose the Cholesky decomposition of  $B_i^T B_i$  is given as  $B_i^T B_i = Z_i Z_i^T$ , the eigen decomposition  $Z_i^{-1} D_i^T D_i (Z_i^{-1})^T$  is  $U_i \text{diag}(s_i) U_i^T$  and  $V_i = B_i (Z_i^{-1})^T U_i$ . It can be shown that  $H_i(\lambda) = V_i^T \text{diag}(\frac{1}{1+\lambda s_1}, \dots, \frac{1}{1+\lambda s_n}) V_i$ , and its trace is given by  $\text{tr}(H_i) = \sum_{i=1}^n \frac{1}{1+\lambda s_i}$

*Proof.* The proof of the first part is given below:

$$\begin{aligned}
 H_i(\lambda) &= B_i (B_i^T B_i + \lambda D_i^T D_i)^{-1} B_i^T = B_i (Z_i Z_i^T + \lambda D_i^T D_i)^{-1} B_i^T \\
 &= B_i (Z_i^{-1})^T (I + \lambda Z_i^{-1} D_i^T D_i (Z_i^{-1})^T)^{-1} (Z_i^{-1}) B_i^T \\
 &= B_i (Z_i^{-1})^T (I + \lambda U_i \text{diag}(s_i) U_i^T)^{-1} (Z_i^{-1}) B_i^T \\
 &= B_i (Z_i^{-1})^T U_i (I + \lambda \text{diag}(s_i))^{-1} U_i^T (Z_i^{-1}) B_i^T \\
 &= V_i (I + \lambda \text{diag}(s_i))^{-1} V_i^T \\
 &= V_i^T \text{diag}(\frac{1}{1+\lambda s_1}, \dots, \frac{1}{1+\lambda s_n}) V_i
 \end{aligned}$$

To compute the trace of  $H_i$ , we first show that  $V_i^T V_i = U_i^T Z_i^{-1} B_i^T B_i (Z_i^{-1})^T U_i = U_i^T U_i = I$ . Thus the trace of  $H_i$  becomes  $\text{tr}(H_i) = \text{tr}(V_i (I + \lambda \text{diag}(s_i))^{-1} V_i^T) = \text{tr}(V_i^T V_i (I + \lambda \text{diag}(s_i))^{-1}) = \text{tr}((I + \lambda \text{diag}(s_i))^{-1}) = \sum_{i=1}^n \frac{1}{1+\lambda s_i}$   $\square$

## Appendix H:

“In this appendix, we applied the extended-maxima transformation method to the simulated images with line anomalies, clustered anomalies and scattered anomalies. The detection results are reported in Figure . Moreover, the FPR, FNR, and computational time for all the benchmark methods are reported in Table 1.”

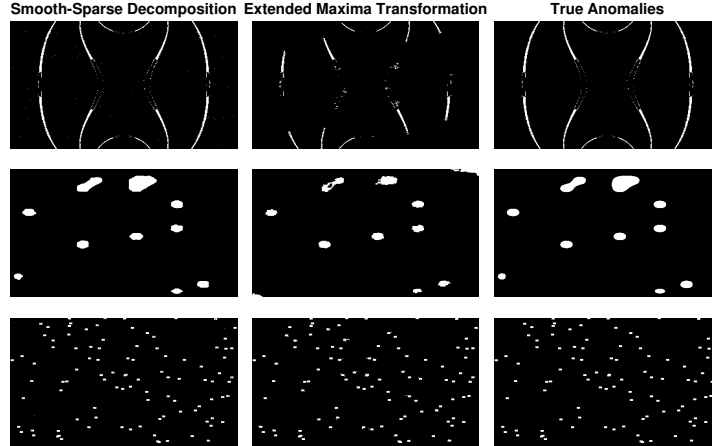

Figure 1: Anomalies detection comparison result for SSD and extended maxima transformation when  $\delta = 3$

## References

Tseng, P. (2001). Convergence of a block coordinate descent method for nondifferentiable minimization. *Journal of Optimization Theory and Applications*, 109(3):475–494.

Table 1: FPR, FNR, and computation time for line , clustered and scattered anomalies with  $\delta = 0.1, 0.2, 0.3$

| $\delta$           | Defect Type | Criterion | SSD    | Edge   | Jump   | Local  | Global | Maxima |
|--------------------|-------------|-----------|--------|--------|--------|--------|--------|--------|
| 0.1                | Line        | FPR       | 0.108  | 0.012  | 0.022  | 0.066  | 0.202  | 0.045  |
|                    |             | FNR       | 0.234  | 0.989  | 0.908  | 0.492  | 0.591  | 0.791  |
|                    | Clustered   | FPR       | 0.016  | 0.0003 | 0.086  | 0.539  | 0.211  | 0.008  |
|                    |             | FNR       | 0.035  | 0.979  | 0.837  | 0.756  | 0.799  | 0.868  |
|                    | Scattered   | FPR       | 0.011  | 0.008  | 0.179  | 0.019  | 0.204  | 0.018  |
|                    |             | FNR       | 0.076  | 0.858  | 0.722  | 0.567  | 0.752  | 0.984  |
| 0.2                | Line        | FPR       | 0.027  | 0.016  | 0.037  | 0.058  | 0.202  | 0.005  |
|                    |             | FNR       | 0.021  | 0.900  | 0.126  | 0.181  | 0.507  | 0.792  |
|                    | Clustered   | FPR       | 0.017  | 0.0003 | 0.083  | 0.052  | 0.213  | 0.002  |
|                    |             | FNR       | 0.005  | 0.89   | 0.127  | 0.462  | 0.673  | 0.657  |
|                    | Scattered   | FPR       | 0.0114 | 0.005  | 0.138  | 0.02   | 0.203  | 0.004  |
|                    |             | FNR       | 0.0153 | 0.293  | 0.108  | 0.251  | 0.595  | 0.038  |
| 0.3                | Line        | FPR       | 0.001  | 0.015  | 0.035  | 0.054  | 0.195  | 0.001  |
|                    |             | FNR       | 0.003  | 0.783  | 0.111  | 0.063  | 0.456  | 0.557  |
|                    | Clustered   | FPR       | 0.018  | 0.001  | 0.081  | 0.046  | 0.211  | 0.007  |
|                    |             | FNR       | 0.001  | 0.754  | 0.054  | 0.289  | 0.572  | 0.268  |
|                    | Scattered   | FPR       | 0.012  | 0.003  | 0.11   | 0.02   | 0.203  | 0.001  |
|                    |             | FNR       | 0.007  | 0.257  | 0.063  | 0.087  | 0.407  | 0.012  |
| Computational Time |             |           | 0.19s  | 0.667s | 38.43s | 0.043s | 0.048s | 0.039s |

'SSD' for Smooth Sparse Decomposition, 'Edge' for edge detection, 'Jump' for jump regression, 'Local' for local thresholding, 'Global' for global thresholding, and 'Maxima' for extended maxima transformation.
